# Supplementary material for: The objective measurement of physical activity and sedentary behaviour in 2–3 year olds and their parents: a cross-sectional feasibility study in the bi-ethnic Born in Bradford cohort
Source: PubMed Central journal article supplement (PMC4641382; doi:10.1186/s12889-015-2481-z), 2015-11-11
Supplement: 12889_2015_2481_MOESM1_ESM.pdf [file 12889_2015_2481_MOESM1_ESM.pdf]

**Physical Activity and Sedentary Behaviour in a Bi-Ethnic Population of Toddlers  
- Feasibility Study -**

**End of Data Collection Interview**

Date: \_\_\_\_ / \_\_\_\_ / \_\_\_\_

Time: \_\_\_\_ : \_\_\_\_

Interviewer: \_\_\_\_\_

Participant's Code: \_\_\_\_\_

**1. Introduction:**

*Thank you very much for taking part in this study! We would just like to ask you some final questions about how easy or difficult it was to wear the activity monitors, fill out the activity diary and the questionnaire, and how useful were the reminders, in order to improve this process for future participants.*

*If you don't mind, I will record our talk to make it easier to remember all the useful details you can tell us. I assure you that your name or any personal details will not be recorded, and we will use only your participant code in the interview and data analysis. Is that alright with you?*

*(In case mother/caregiver does not give consent to record: That is no problem, in that case I will just take some notes.)*

**2. Questions about the activity monitor:**

**2.1.** Was the activity monitor difficult for:

**2.1.1.** Your child to wear?  YES  NO

*If YES - Could you tell me a bit more about it?*

---

---

---

---

**2.1.2.** You to wear?  YES  NO

*If YES - Could you tell me a bit more about it?*

---

---

---

---

Participant code: \_\_\_\_\_

2.1.3. Your husband/partner to wear?

YES

NO

*If YES* - Could you tell me a bit more about it?

---



---



---



---

### 3. Questions about the Activity Diaries,

3.1. Was it difficult filling out the activity diary?

YES

NO

*If YES* - Could you tell me why?

Understanding how to fill out the diary?

Remembering to fill out the diary daily?

Takes too much time to fill out?

Other reason? \_\_\_\_\_

---



---



---



---

### 4. Questions about the reminders to wear the activity monitors:

4.1. What type of reminder did you have:

Magnets

Daily text message

4.2. Did you find it helpful in reminding you to wear the activity monitors every day?

YES

NO

### 5. Questions about the questionnaire:

5.1. Did you find the questionnaire difficult to answer?

YES

NO

*If YES* - Could you tell me why?

Did not understand some questions? Which ones? \_\_\_\_\_

---

Participant code: \_\_\_\_\_

Did not understand some words? Which ones? \_\_\_\_\_

Takes too much time to answer?

Other reason? \_\_\_\_\_

**If NO** – Did you find any words hard to understand?

YES

NO

**If YES** – Can you tell me which ones? \_\_\_\_\_

## 6. Suggestions

**6.1.** Do you have any suggestions to make it easier to wear the accelerometers, fill out the activity diaries, understand the questionnaire, or anything you think we could have done differently?

---



---



---



---



---

**7.** Would you say this week of wearing the monitors was a typical week, or was it more active or less active than usual? (*If more/less* → Why?)

---



---



---



---



---

**8.** Lastly, did your child have any illness that caused diarrhoea, vomiting or loss of appetite during the past week?

YES

NO

Participant code: \_\_\_\_\_
